# Supplementary material for: Prognostic significance of tumor-associated neutrophils and circulating neutrophils in glioblastoma, IDH wild-type
Source: Research Square preprint supplement (doi:10.21203/rs.3.rs-1642508/v2), 2022-06-22
Supplement: Supplementary file 1 [file 49d9c59936d9f137acd79643.docx]

Table S1. Characteristics of the study population based on the level of peripheral blood neutrophils before radiotherapy.

| Variables | Total  (n = 143) | High  (n = 113) | Low  (n = 30) | p |
| --- | --- | --- | --- | --- |
| Age.cat |  |  |  | 0.34 |
| ~60 | 102 (71) | 78 (69) | 24 (80) |  |
| 61~ | 41 (29) | 35 (31) | 6 (20) |  |
| Sex |  |  |  | 0.23 |
| Female | 51 (36) | 37 (33) | 14 (47) |  |
| Male | 92 (64) | 76 (67) | 16 (53) |  |
| MGMT promoter |  |  |  | 0.987 |
| methylated | 55 (38) | 44 (39) | 11 (37) |  |
| un-methylated/Unknown | 88 (62) | 69 (61) | 19 (63) |  |
